# Supplementary material for: Organ-on-chip model shows that ATP release through connexin hemichannels drives spontaneous Ca2+ signaling in non-sensory cells of the greater epithelial ridge in the developing cochlea
Source: Royal Society of Chemistry journal article supplement (doi:10.1039/d0lc00427h), 2020-01-01
Supplement: d0lc00427h1.pdf [file d0lc00427h1.pdf]

## Supplementary Video Descriptions

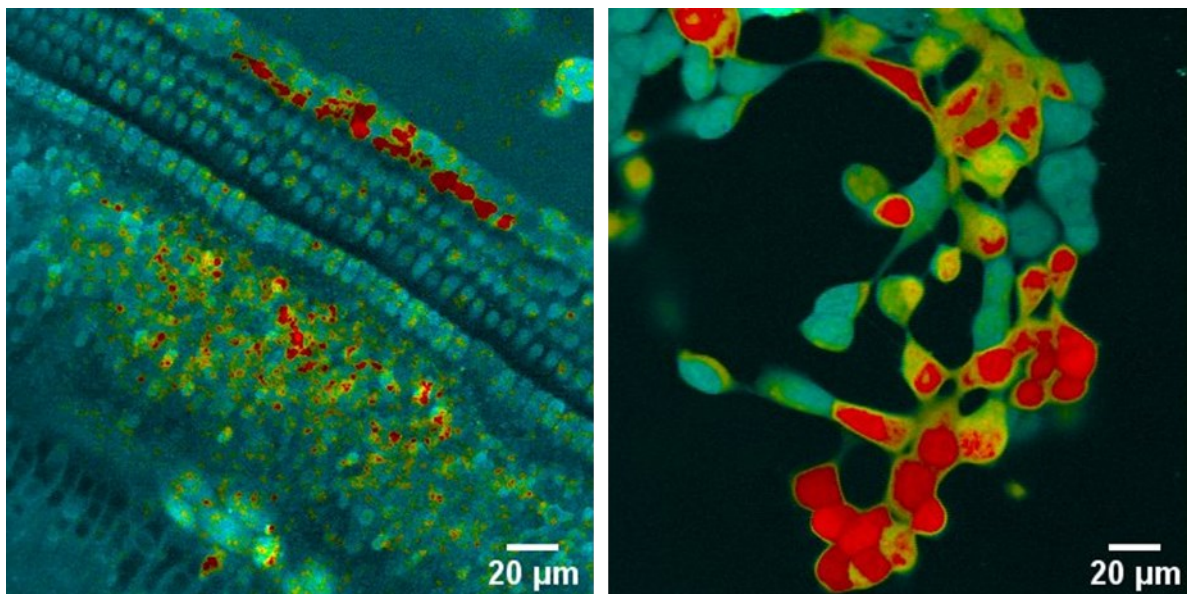

**Video S1. ATP-WCBs response to ATP release after stimulated Ca<sup>2+</sup> signals in wild type cochlea.** The cochlear organotypic culture (left) and the ATP-WCBs (right) are mounted in the microfluidic chamber facing one another on two different planes and loaded with Fluo-8. Images were acquired at 1 Hz for 80 s and played back in the video at 10 Hz.

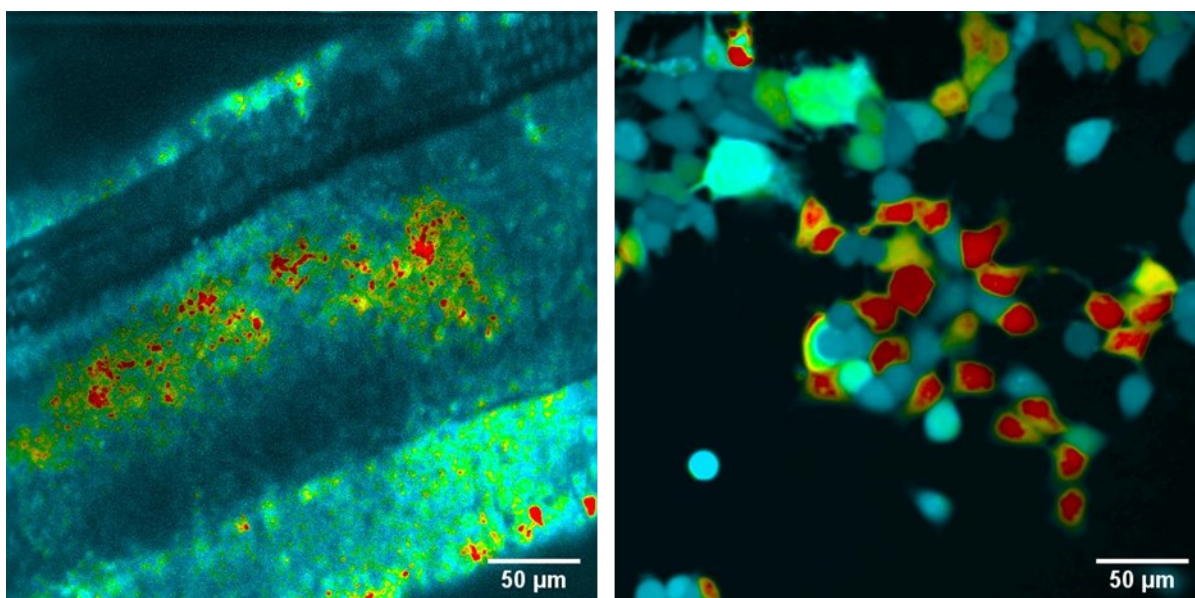

**Video S2. Simultaneous two-focal planes imaging on Panx1<sup>-/-</sup> cochlear organotypic cultures and on ATP-WCBs.** Activation of ATP-WCBs (right) triggered by local release of ATP molecules during ATP-mediated Ca<sup>2+</sup> waves in non-sensory cells of the GER of postnatal cochlea from Panx1<sup>-/-</sup> (left). Images were acquired at 1 Hz for 180 s and played back in the video at 10 Hz.

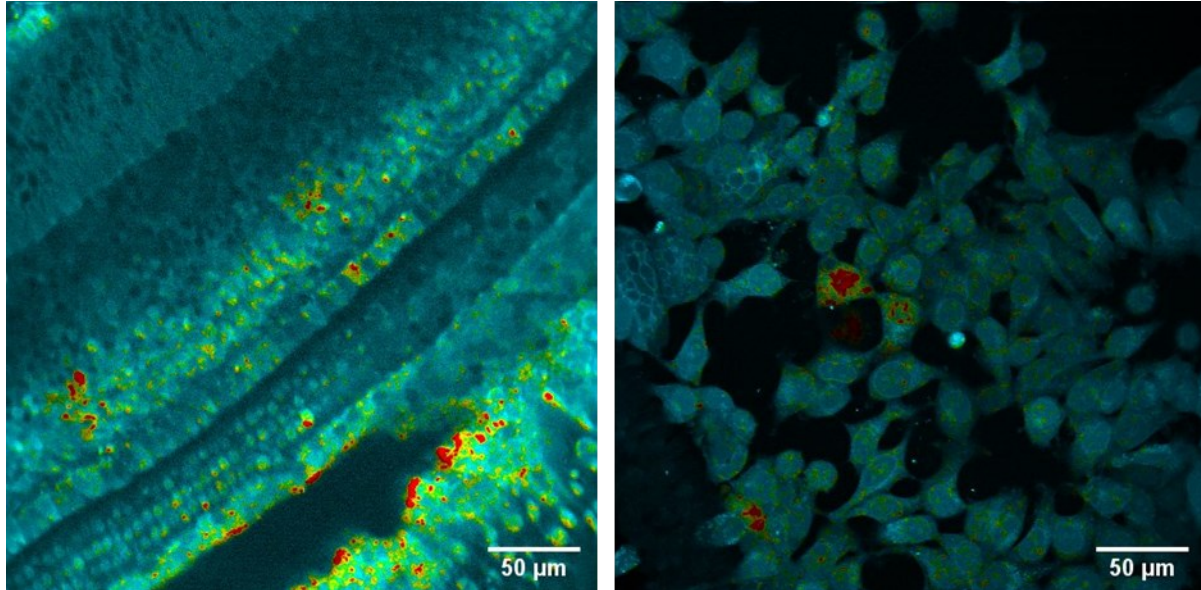

**Video S3. Simultaneous two-focal planes imaging on  $Gjb6^{-/-}$  cochlear organotypic cultures and on ATP-WCBs.** Lack of spontaneous  $Ca^{2+}$  signals in non-sensory cells of the GER of postnatal cochlea from  $Gjb6^{-/-}$  (left) and consequent absence of signals on ATP-WCBs (right). Images were acquired at 1 Hz for 110 s and played back in the video at 10 Hz.
